# Supplementary material
Source: Elsevier journal article supplement (https://www.sciencedirect.com/science/article/pii/S0211699521001168)
Supplement: mmc1 [file S0211699521001168:mmc1.pdf]

SUPPLEMENTARY FILES

Supplementary Table 1 – Main observational studies analyzed

| 1 <sup>st</sup> Author         | Year | Country | n    | Physical Activity Assessment                        | Conclusions                                       |
|--------------------------------|------|---------|------|-----------------------------------------------------|---------------------------------------------------|
| Physical Functioning           |      |         |      |                                                     |                                                   |
| Painter                        | 2017 | USA     | 45   | Gait speed, chair stand, 6min walk, ISWT, SF-36     | HD patients' PF/PA ≈ PD patients' PF/PA           |
| As'habi                        | 2018 | Iran    | 79   | Bioelectrical impedance analysis, handgrip strength | Dynapenia ↔ ↓PA, ↑Age, ↑diabetes mellitus         |
| Cupisti                        | 2017 | Italy   | 151  | RAPA, 30" STS chair test                            | ↑PA ↔ ↓MIS, ↑BCMI                                 |
| Nutritional Status             |      |         |      |                                                     |                                                   |
| Cobo                           | 2015 | Spain   | 64   | Pedometer                                           | ↑PA ↔ ↑Nutritional Status, ↑Lean body mass, ↓CRP  |
| Wakamiya                       | 2015 | Japan   | 44   | GNRI, accelerometer                                 | ↓PA ↔ ↓Nutritional Status                         |
| Masuda                         | 2009 | Japan   | 26   | Pedometer                                           | ↑PA ↔ ↑HDL-3C                                     |
| Hard Clinical Outcomes         |      |         |      |                                                     |                                                   |
| Stack                          | 2005 | Ireland | 1203 | USRDS                                               | 4-5/weeks PE ↔ ↑Survival                          |
| Ming Pei                       | 2019 | Sweden  | 400  | SF-36                                               | ↑PA ↔ ↓ all-cause mortality                       |
| Grincenkov                     | 2015 | Brazil  | 1624 | SF-36                                               | ↓HRQoL ↔ ↓Survival                                |
| Health-Related Quality of Life |      |         |      |                                                     |                                                   |
| Uchiyama                       | 2018 | Japan   | 50   | ISWT, handgrip and quadriceps strength, KDQoL-SF    | ↑ISWT ↔ ↑HRQoL                                    |
| Johansen                       | 2010 | USA     | 1457 | USRDS, Self-reporting questionnaire                 | ↓PA ↔ ↓Physical function, ↓Mental Health          |
| Bakewell                       | 2002 | UK      | 88   | SGA, KDQoL-SF                                       | ↓Nutritional Status ↔ ↓Physical and Mental health |

**Table 1.** *PD - Peritoneal Dialysis; HD - Hemodialysis; PE - physical exercise; PA - physical activity; RAPA - rapid assessment of physical activity test; MIS - malnutrition-inflammation score; BCMI - body cell mass index; CRP - C-reactive protein; GNRI - Geriatric Nutritional Risk Index; USRDS - United States Renal Data System; HRQoL - health-related quality of life; ISWT - Incremental Shuttle Walking test; SF-36 - Short Form 36 Health Survey; KDQoL-SF - Kidney Disease Quality of Life Short Form*

**Supplementary Table 2 – Main interventional studies analyzed**

| Author      | Year | Country | n  | Intervention                                             | Follow-up Duration | Conclusions                                                       |
|-------------|------|---------|----|----------------------------------------------------------|--------------------|-------------------------------------------------------------------|
| Uchiyama    | 2019 | Japan   | 47 | Aerobic exercise and resistance training                 | 3M                 | ↑HRQoL, ↑Physical capacity (ISWT)                                 |
| Koufaki     | 2002 | UK      | 12 | Bike ergometer, 3x/week                                  | 3M                 | ↑Peak exercise capacity (VO <sub>2</sub> peak)                    |
| Mustata     | 2005 | Canada  | 6  | Tai chi                                                  | 3M                 | ↑Physical functioning (SF-36)                                     |
| Lee         | 2004 | Korea   | 19 | Telephone-based PA Reinforcement Program, SCL-90-R       | 3M                 | ↑Exercise compliance, ↓Depression                                 |
| Chi-yuen Lo | 1998 | China   | 13 | Treadmill, cycling and arm ergometers, 45-60min, 3x/week | 3M                 | ↑HRQoL, ↑Physical functioning, ↓FBS, ↑HDL                         |
| Shahgholian | 2015 | Iran    | 22 | Cycling, 40min, 2x/week                                  | 2M                 | ↓FBS, ↓PPBS                                                       |
| Derici      | 2005 | Turkey  | 3  | Cycling in a supine position, 30min/daily                | 1M                 | Reinforcement of the abdominal musculature helps leaks resolution |

**Table 2.** *HRQoL* - health-related quality of life; *ISWT* - incremental shuttle walking test; *SF-36* - short form 36 health survey; *SCL-90-R* - Symptom Checklist-90-R; *FBS* - fasting blood sugar; *PPBS* - post-prandial blood sugar

**Supplementary Table 3 – Most frequent barriers and limitations to physical exercise practice by PD patients**

**Barriers and Limitations to Physical Exercise Practice**

|                                              |
|----------------------------------------------|
| Fatigue                                      |
| Frailty                                      |
| Weakness                                     |
| Shortness of breath                          |
| Reduced physical capacity                    |
| High economic costs                          |
| Lack of time                                 |
| Lack of adequate exercise programs           |
| Fear of abdominal herniation                 |
| Fear of abdominal dialysate leaks            |
| Fear of catheter site infection              |
| Lack of information and instructions         |
| Inadequate exercise monitoring and follow-up |
| Poor motivation                              |
